# Supplementary material for: Urinary Volatile Organic Compound Metabolites Are Associated with Reduced Lung Function in U.S. Children and Adolescents
Source: MDPI journal article supplement (doi:10.3390/toxics12040289), 2024-04-16
Supplement: s1 [file s1]

**Supplemental Table S1:** Geometric means (GMs [SE]) of FEV<sub>1</sub> % predicted and FEV<sub>1</sub>/FVC by characteristics of study participants, NHANES 2011-2012 (N=505)

| characteristics    | FEV <sub>1</sub> % predicted | FEV <sub>1</sub> /FVC |
|--------------------|------------------------------|-----------------------|
| All                | 98.07 (1.21)                 | 85.25 (0.51)          |
| Age groups         |                              |                       |
| 6 to 11 years old  | 99.56 (1.59)                 | 85.08 (0.61)          |
| 12 to 17 years old | 96.79 (1.54)                 | 85.41 (0.77)          |
| Sex                |                              |                       |
| Males              | 97.48 (1.57)                 | <b>83.34 (0.77)</b>   |
| Females            | 98.68 (1.65)                 | <b>87.22 (0.63)</b>   |
| Race/ethnicity     |                              |                       |
| Non-Hispanic White | 97.31 (1.89)                 | 84.45 (0.80)          |
| Non-Hispanic Black | 100.60 (2.07)                | 85.50 (0.48)          |
| Mexican American   | 98.16 (0.83)                 | 85.92 (0.53)          |
| Other              | -                            | 87.36 (0.61)          |
| PIR                |                              |                       |
| ≤ 1                | 98.28 (0.95)                 | 85.75 (0.62)          |
| > 1                | 98.01 (1.53)                 | 85.09 (0.65)          |
| Cotinine           |                              |                       |
| <1.0 ng/mL         | 101.04 (1.39)                | 85.41 (0.79)          |
| ≥ 1.0 ng/mL        | 97.68 (1.47)                 | 84.04 (0.55)          |
| BMI                |                              |                       |
| Normal             | 97.27 (1.29)                 | <b>85.44 (0.58)</b>   |
| Overweight         | 102.18 (2.41)                | <b>85.81 (0.95)</b>   |
| Obese              | 100.23 (2.74)                | <b>82.71 (0.99)</b>   |

Abbreviations: PIR: poverty income ratio; BMI: body mass index.  
 Bold fonts indicate significant differences in lung function.
